# Supplementary material for: Direct growth of doping controlled monolayer WSe2 by selenium-phosphorus substitution
Source: Royal Society of Chemistry journal article supplement (doi:10.1039/c8nr03427c), 2018-01-01
Supplement: c8nr03427c1.pdf [file c8nr03427c1.pdf]

## Electronic Supporting Information

# Direct Growth of Doping Controlled Monolayer WSe<sub>2</sub> by Selenium-Phosphorus Substitution

Won Tae Kang<sup>a</sup>, Il Min Lee<sup>a</sup>, Seok Joon Yun<sup>b,c</sup>, Young Il Song<sup>d</sup>, Kunnyun Kim<sup>e</sup>, Do-Hwan Kim<sup>b</sup>, Yong Seon Shin<sup>a</sup>, Kiyoun Lee<sup>f</sup>, Jinseong Heo<sup>f</sup>, Young-Min Kim<sup>b,c</sup>, Young Hee Lee<sup>b,c</sup> and Woo Jong Yu<sup>\*a</sup>

<sup>a</sup>Department of Electronic and Electrical Engineering, Sungkyunkwan University, Suwon, 16419, Republic of Korea.

<sup>b</sup>Department of Energy Science, Sungkyunkwan University, Suwon, 16419, Republic of Korea.

<sup>c</sup>IBS Center for Integrated Nanostructure Physics, Institute for Basic Science (IBS), Sungkyunkwan University, Suwon, 16419, Republic of Korea.

<sup>d</sup>Department of Advanced Materials Science & Engineering, Sungkyunkwan University, Suwon, 16419, Republic of Korea.

<sup>e</sup>Korea Electronics Technology Institute, Seongnam, 13509, Republic of Korea.

<sup>f</sup>Samsung Advanced Institute of Technology, Suwon, 16678, Korea.

\*Corresponding author E-mail: [micco21@skku.edu](mailto:micco21@skku.edu)

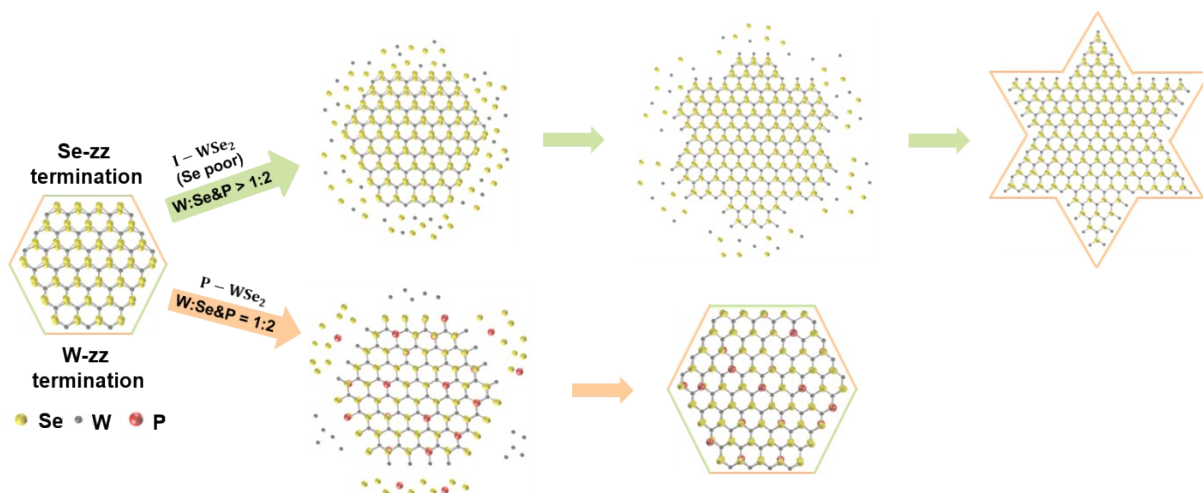

**Figure S1.** Schematic illustration of the domain shape changes and their comparison between intrinsic and P-doped WSe<sub>2</sub>. Schematic ball-and-stick models for the different shapes of the monolayer WSe<sub>2</sub> structure. The initial crystal structure on the left shows two types (W or Se) of WSe<sub>2</sub> terminations. The schematic diagram on the right illustrates the domain shape changing procedure depending on the W:Se&P rates of the two different terminations.

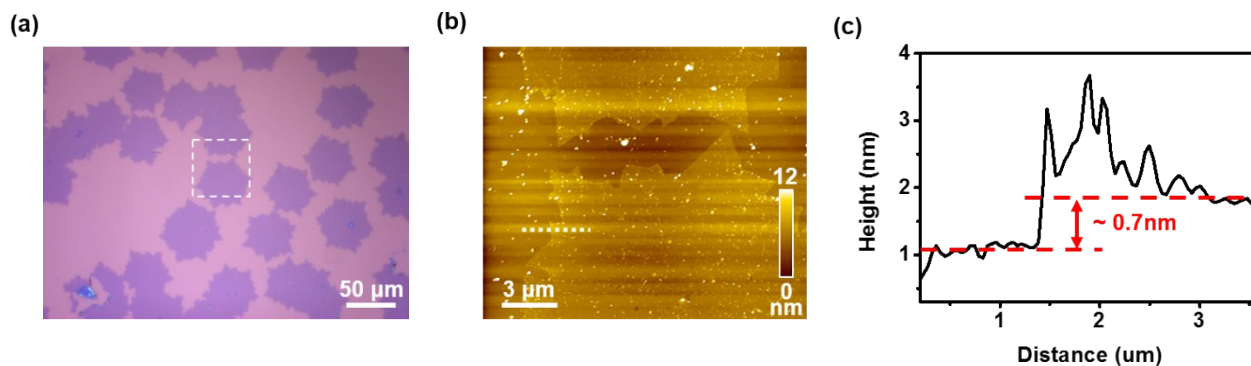

**Figure S2.** AFM images of P-doped WSe<sub>2</sub> layers. (a) Optical image of CVD grown P-doped WSe<sub>2</sub> layers. (b) AFM image of the dotted area in (a). Height profile of a WSe<sub>2</sub> layer taken across the dotted line in (b), which indicates the monolayer thickness.

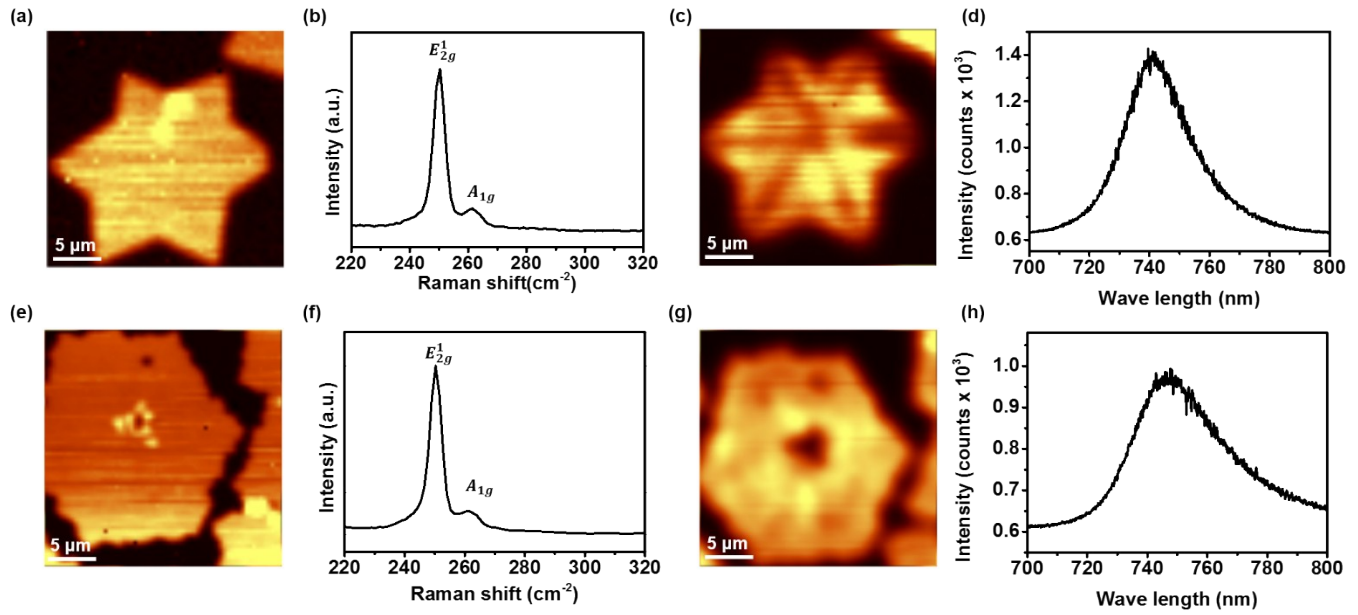

**Figure S3.** Raman and photoluminescence spectra of other intrinsic and p-doped WSe<sub>2</sub> flakes. (a) Scanning Raman intensity at the  $E_{2g}^1$  peak of intrinsic WSe<sub>2</sub>. (b) Raman spectrum of intrinsic WSe<sub>2</sub>. (c) Scanning photoluminescence of intrinsic WSe<sub>2</sub>. (d) Photoluminescence spectrum of intrinsic WSe<sub>2</sub>. (e) Scanning Raman intensity at the  $E_{2g}^1$  peak of P-doped WSe<sub>2</sub>. (f) Raman spectrum of P-doped WSe<sub>2</sub>. (g) Scanning photoluminescence of P-doped WSe<sub>2</sub>. (h) Photoluminescence spectrum of P-doped WSe<sub>2</sub>. Scale bars are 5  $\mu$ m.

### Supporting information 1: 2D carrier concentration calculation

The 2D carrier concentration in an p-type semiconductor is derived from the drift current density ( $J$ )<sup>1,2</sup> equation:

$$J = qn\mu_n E + qp\mu_p E = \sigma E \quad (\text{Equation 1})$$

Where,  $q$  is the electron charge,  $E$  is the electron field,  $n$  is electron concentration,  $p$  is hole concentration,  $\mu_n$  is electron mobility,  $\mu_p$  is hole mobility, and  $\sigma$  is conductivity respectively.

P-doped WSe<sub>2</sub> is p-type semiconductor materials with hole majority carrier (equal to 2D carrier concentration,  $n_{2d}$ ), electron minority carrier can be neglected and the supplementary equation 1 becomes:

$$J = qn_{2d}\mu_p E \quad (\text{Equation 2})$$

Carrier concentration can be calculated by:

$$n_{2d} = \frac{J}{q\mu_p E} = \frac{\sigma}{q\mu_p} \quad (\text{Equation 3})$$

To calculate the conductivity, we use the following equation:

$$\sigma = \frac{I_{ds} L}{V_{ds} W} \quad (\text{Equation 4})$$

Where,  $I_{ds}$  is the drain current,  $V_{ds}$  is the drain voltage,  $L$ , and  $W$  are the channel length and channel width, respectively.

To calculate the hole mobility, we use the following equation:

$$\mu_p = \frac{G_m L}{C_i V_{ds} W} \quad (\text{Equation 5})$$

Where,  $G_m$  and  $C_i$  are transconductance and capacitance per unit area, respectively.

Using above conductivity and hole mobility equation, the equation 3 becomes:

$$n_{2d} = \frac{I_{ds} L}{q\mu_p V_{ds} W} = \frac{I_{ds} C_i}{qG_m} \quad (\text{Equation 6})$$

Based on the conductivity-voltage characteristic in Figure 7b, we extract the doping concentrations.

## References

- 1 Q. A. Vu, Y. S. Shin, Y. R. Kim, V. L. Nguyen, W. T. Kang, H. Kim, D. H. Luong, I. M. Lee, K. Lee, D. Ko, J. Heo, S. Park, Y. H. Lee, W. J. Yu, *Nat. Commun.*, 2016, **7**, 1–8.
- 2 H. Y. Jeong, Y. Jin, S. J. Yun, J. Zhao, J. Baik, D. H. Keum, H. S. Lee, Y. H. Lee, *Adv. mater.*, 2017, **29**, 1–6.
